# Supplementary material for: Tuning of the photophysical and electrochemical properties of symmetric and asymmetric conjugated thiophenoazomethines
Source: RSC Adv. 2018 Apr 3;8(23):12779–84. doi: 10.1039/c8ra00570b (PMC9079336; doi:10.1039/c8ra00570b)
Supplement: RA-008-C8RA00570B-s001 [file RA-008-C8RA00570B-s001.pdf]

## Supporting information

# Tuning of the Photophysics and Electrochemistry of Symmetric and Asymmetric conjugated Thiopheno Azomethines

Shengzhen Liu<sup>ab</sup>, Ti Wu<sup>b\*</sup>, Qi Zhu<sup>ab</sup>, Jialing Pu<sup>b</sup>, Guangxue Chen<sup>a</sup>, Weimin Zhang<sup>b</sup>,  
Zhongxiao Li<sup>b</sup>

- a. South China University of Technology, State Key Laboratory of Pulp and Paper Engineering, 381 Wushan Road, Tianhe District, Guangzhou, P.R.China, 510641
- b. Beijing Institute Of Graphic Communication, Information Recording Material Lab, Lab of Printing & Packing Materials and Technology, No.1 (band -2) Xinghua Street, Daxing District, Beijing, P. R. China, 102600

## 1. Experimental procedures

### General method

All chemicals were of reagent grade and used without further purification unless otherwise indicated. 2,5-diamino-thiophene-3,4-dicarboxylic acid diethyl ester and 2-aminothiophene-3-carbonitrile synthesized as described previously<sup>[27][28]</sup>. The <sup>1</sup>H and <sup>13</sup>C NMR spectra were recorded with a Bruker 300 MHz NMR spectrometer by using CDCl<sub>3</sub> as the solvent. Chemical shifts (δ) are given in ppm relative to CDCl<sub>3</sub> (δ=7.26 ppm for <sup>1</sup>H and 77 ppm for <sup>13</sup>C). MS data were recorded with a mass spectrometer. The TGA analyses were performed with a thermal analysis system that was set to a heating rate of 10 °C min<sup>-1</sup> under nitrogen at room temperature. The UV/Vis absorption spectra of the conjugated thiopheno azomethines compounds were recorded in trichloromethane with a UV/Vis spectrophotometer. Cyclic voltammograms were recorded under nitrogen using a one-compartment, three-electrode cell, equipped with a platinum wire as counter electrode, platinum plate as working electrode, saturated Ag/Ag<sup>+</sup> as the reference electrode. The supporting electrolyte was 0.1M tetrabutylammounium hexafluorophosphate (Bu<sub>4</sub>NPF<sub>6</sub>) and the measurements were conducted on compounds in deoxygenated DCM.

## Synthetic procedures

**Synthesis of 3:**  $^1\text{H}$  NMR(300MHz,  $\text{CDCl}_3$ ) :  $\delta$  (ppm)=8.08(s, H), 7.44(d, H), 7.34(s, H), 7.07(s, H), 6.31(s, 2H), 4.44-4.38(m, 2H), 4.28-4.21(m, 2H), 1.47-1.42(t, 3H), 1.33-1.28(t, 3H);  $^{13}\text{C}$  NMR(75MHz,  $\text{CDCl}_3$ ) :  $\delta$ (ppm)=165.3, 164.4, 159.3, 145.9, 142.5, 133.9, 131.0, 130.1, 129.3, 127.7, 61.4, 60.2, 14.1. MS(EI-MS): calcd. for  $\text{C}_{15}\text{H}_{16}\text{N}_2\text{O}_4\text{S}_2$  [M] $^+$  352.06, found 352.

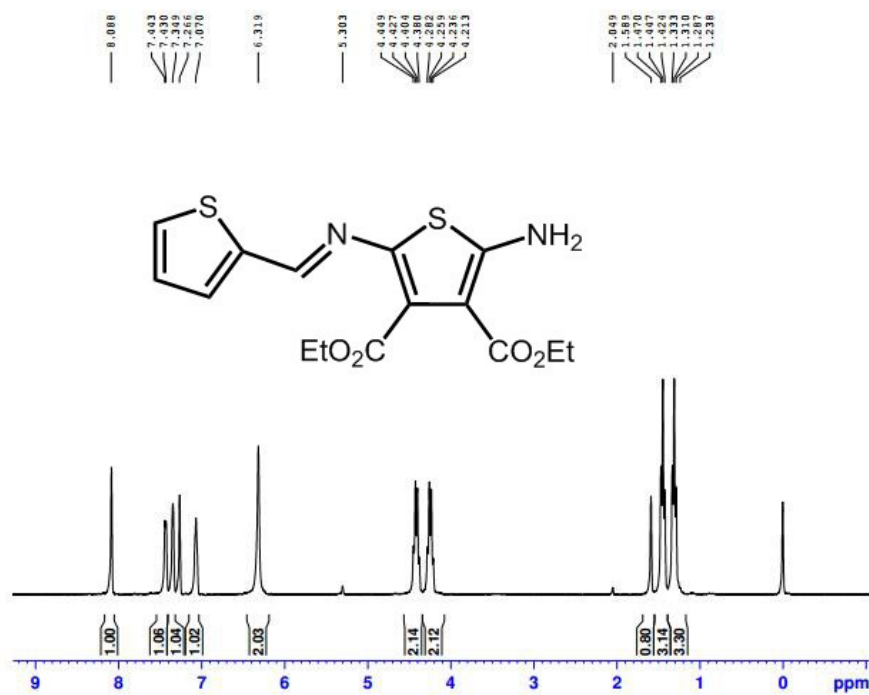

Figure S1.  $^1\text{H}$  NMR spectrum of compound 3

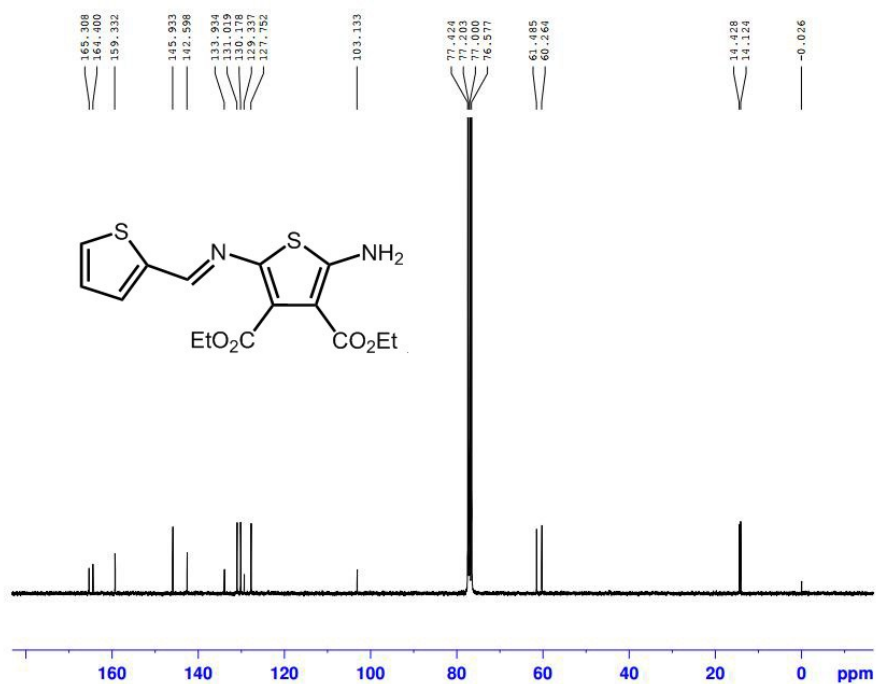

Figure S2.  $^{13}\text{C}$  NMR spectrum of compound 3

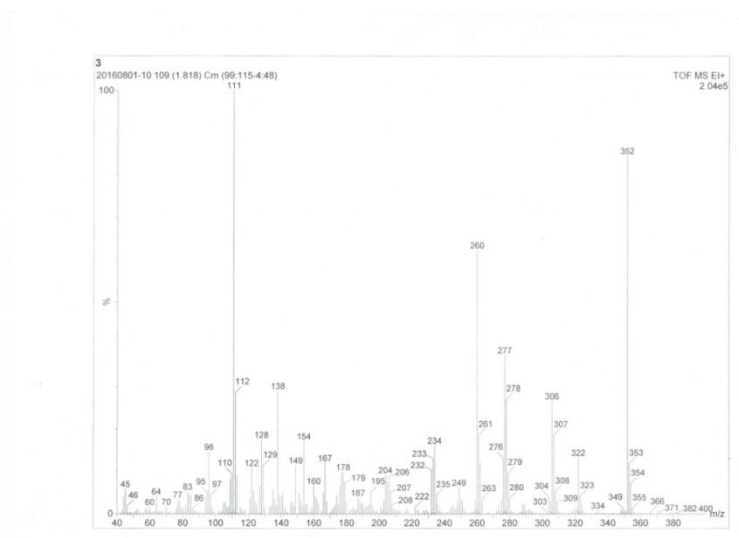

Figure S3. MS spectrum of compound 3

**Synthesis of 4:** In a 100 mL round bottom flask were dissolved 1(258mg, 1 mmol) in absolute isopropanol(60 mL), 5-bromothiophene-2-carboxaldehyde (287mg, 1.5mmol) and a catalytic amount of trifluoroacetic acid (TFA) was added. The mixture was refluxed for 16 hours. The solvent was removed in vacuo, and the product was purified by chromatography on a silica gel column (dichloromethane), then recrystallized with ethanol to yield 4 (194mg, 45 % yield) as a red solid.  $^1\text{H}$  NMR(300MHz,  $\text{CDCl}_3$ ):  $\delta$  (ppm)=7.93(s, H), 7.11-7.02(m, 2H), 6.33(s, 2H), 4.44-4.37(m, 2H), 4.28-4.21(m, 2H), 1.47-1.42(t, 3H), 1.33-1.29(t, 3H);  $^{13}\text{C}$  NMR(75MHz,  $\text{CDCl}_3$ ):  $\delta$ (ppm)=165.1, 164.3, 159.5, 144.6, 144.1, 133.3, 130.8, 130.7, 129.9, 118.3, 103.1, 61.5, 60.3, 14.4, 14.1. MS(EI-MS): calcd. for  $\text{C}_{15}\text{H}_{15}\text{BrN}_2\text{O}_4\text{S}_2$   $[\text{M}]^+$  431.3, found 432.

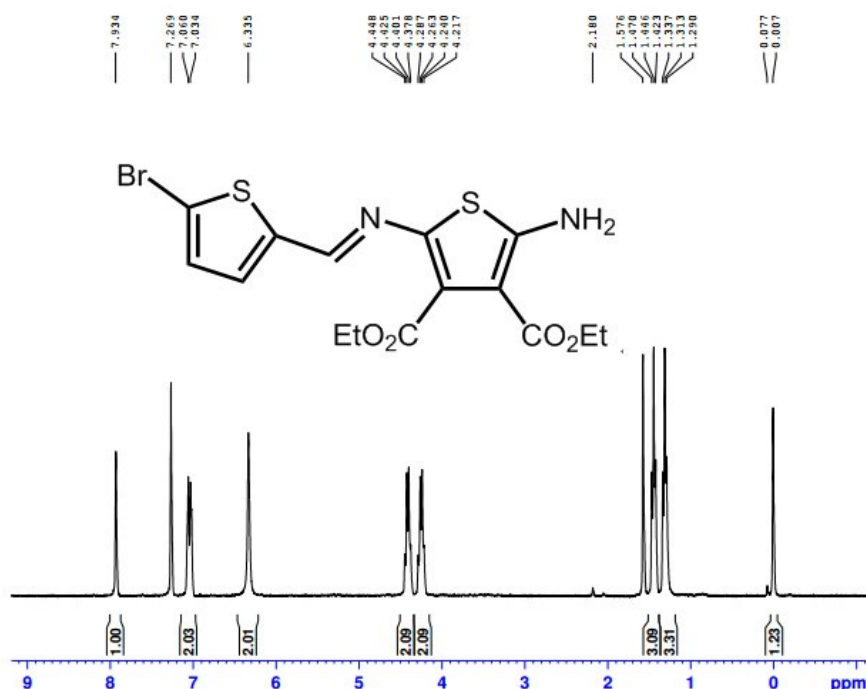

Figure S4.  $^1\text{H}$  NMR spectrum of compound 4

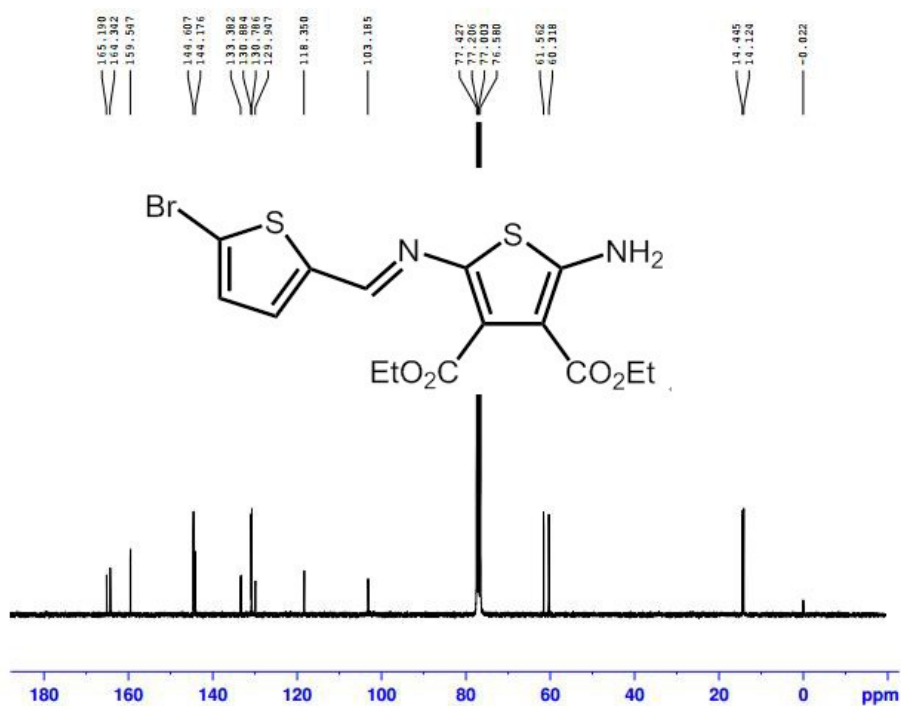

Figure S5.  $^{13}\text{C}$  NMR spectrum of compound 4

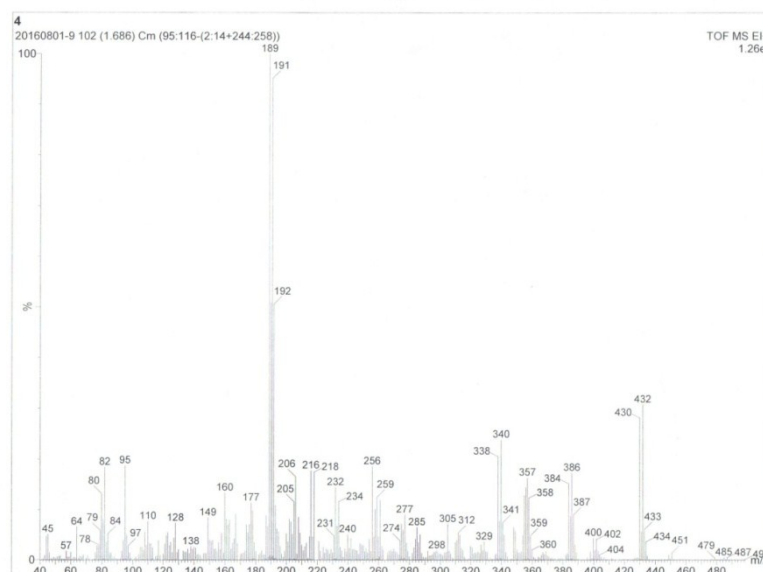

Figure S6. MS spectrum of compound 4

**Synthesis of 5:** The synthesis method was same as compound 4.  $^1\text{H}$  NMR(300MHz,  $\text{CDCl}_3$ ):  $\delta$  (ppm)=7.99(s, H), 7.16(s, H), 6.73(s, H), 6.27(s, 2H), 4.44-4.37(m, 2H), 4.28-4.21(m, 2H), 2.52(s, 3H), 1.47-1.42(t, 3H), 1.33-1.28(t, 3H);  $^{13}\text{C}$  NMR(75MHz,  $\text{CDCl}_3$ ):  $\delta$ (ppm)=165.4, 164.4, 146.2, 145.9, 140.4, 134.4, 131.7, 128.4, 126.3, 102.9, 61.4, 60.2, 14.4, 14.1. MS(EI-MS): calcd. for  $\text{C}_{16}\text{H}_{18}\text{N}_2\text{O}_4\text{S}_2$   $[\text{M}]^+$  366, found 366.

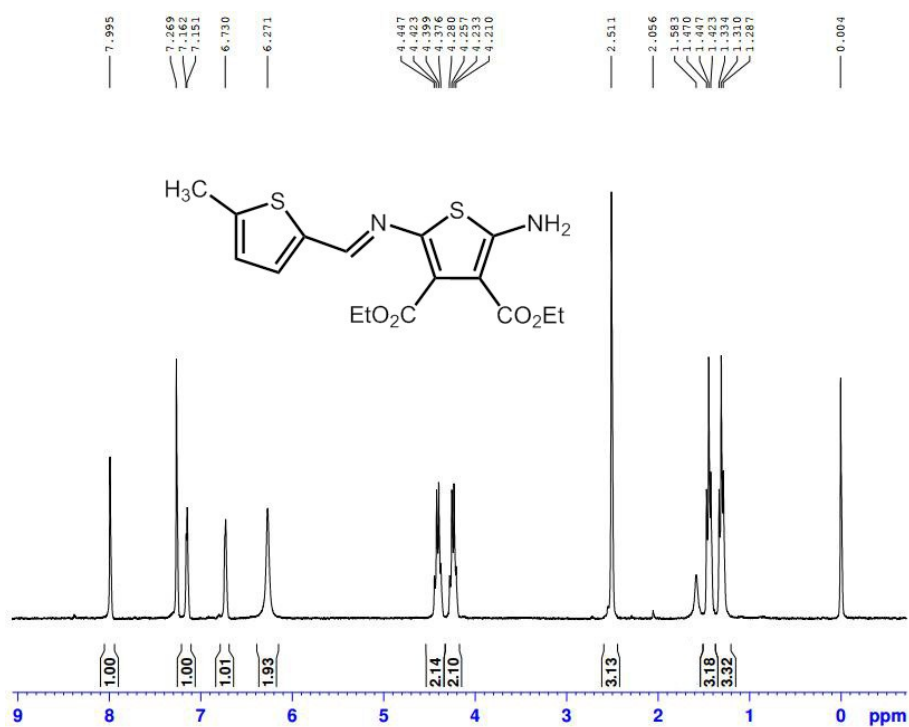

Figure S7. <sup>1</sup>H NMR spectrum of compound 5

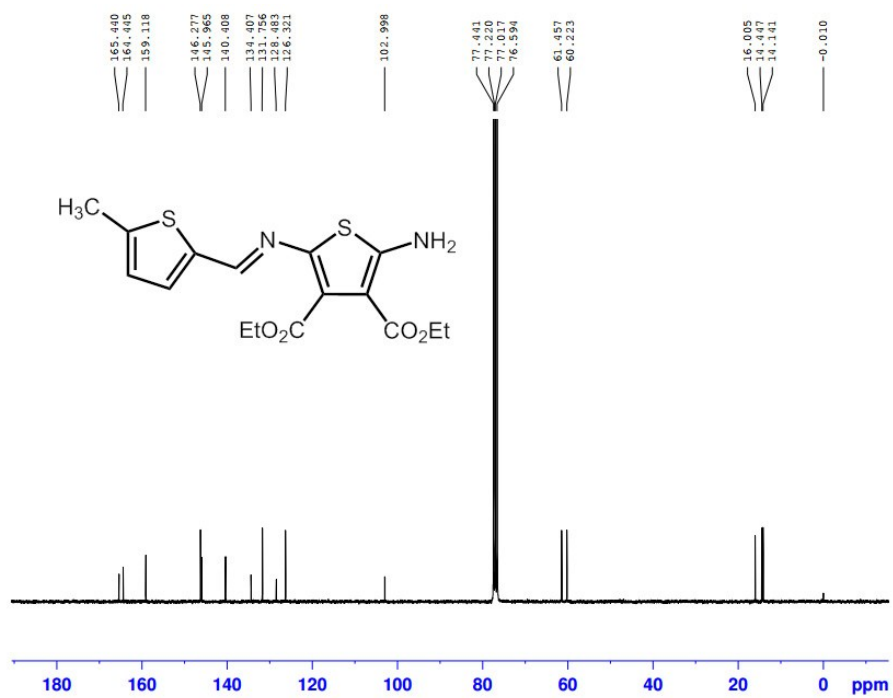

Figure S8. <sup>13</sup>C NMR spectrum of compound 5

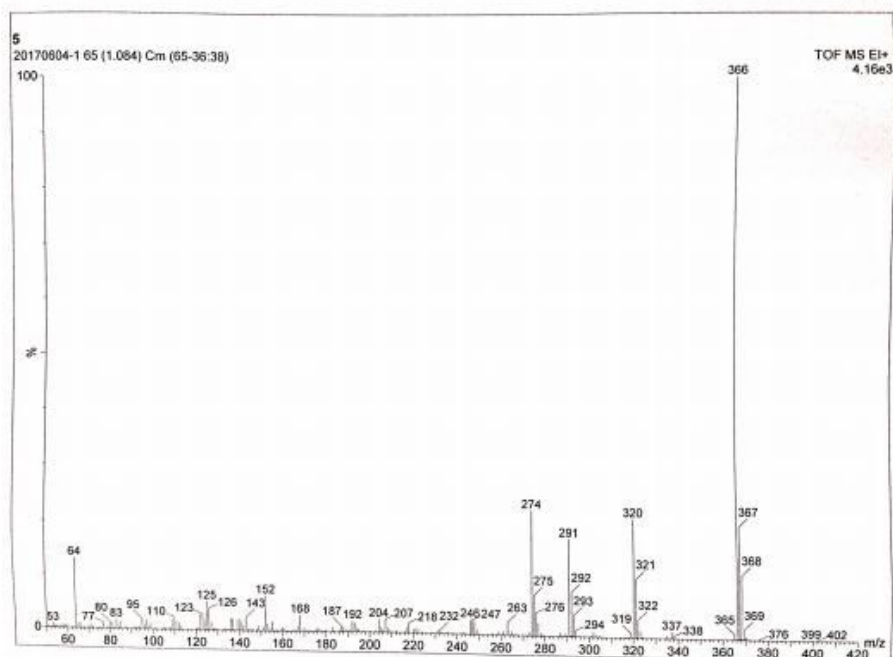

Figure S9. MS spectrum of compound 5

**Synthesis of 6:** The synthesis method was same as compound 4.  $^1\text{H}$  NMR(300MHz,  $\text{CDCl}_3$ ):  $\delta$  (ppm)=7.93(s, H), 7.85(s, H), 7.21(s, H), 6.54(s, 2H), 4.47-4.40(m, 2H), 4.29-4.22(m, 2H), 1.48-1.43(t, 3H), 1.34-1.29(t, 3H);  $^{13}\text{C}$  NMR(75MHz,  $\text{CDCl}_3$ ):  $\delta$ (ppm)=164.7, 164.1, 160.9, 153.0, 148.7, 142.6, 133.3, 131.8, 128.8, 128.0, 103.7, 61.9, 60.6, 14.4, 14.1. MS(EI-MS): calcd. for  $\text{C}_{15}\text{H}_{15}\text{N}_3\text{O}_6\text{S}_2$   $[\text{M}]^+$  397, found 397.

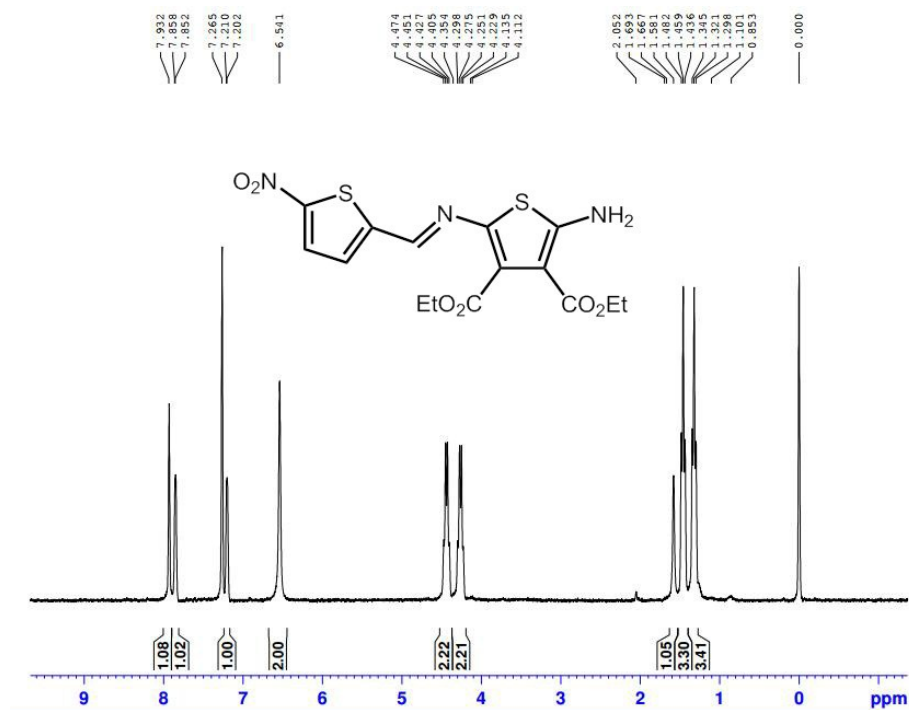

Figure S10. <sup>1</sup>H NMR spectrum of compound 6

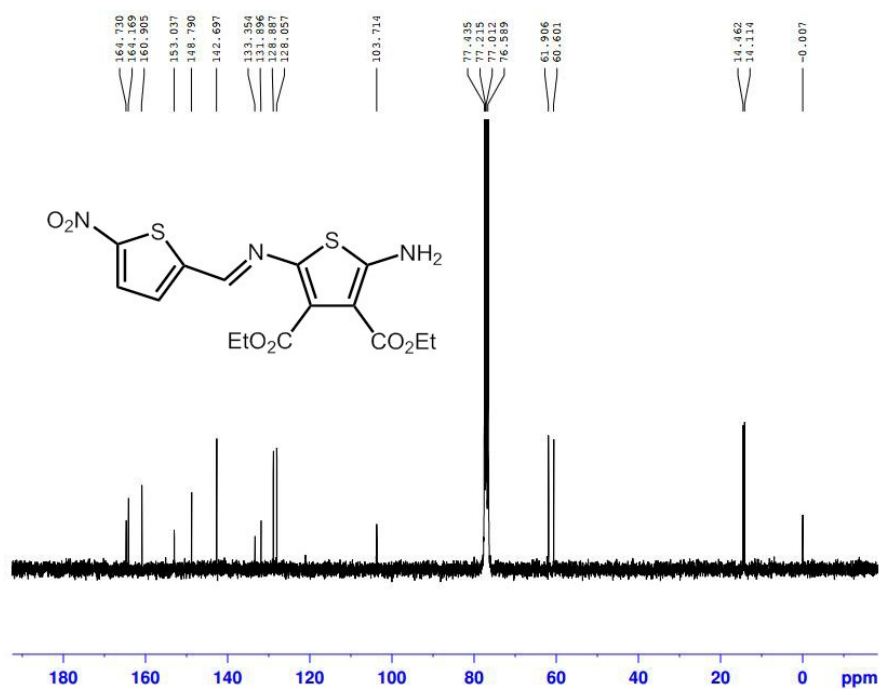

Figure S11. <sup>13</sup>C NMR spectrum of compound 6

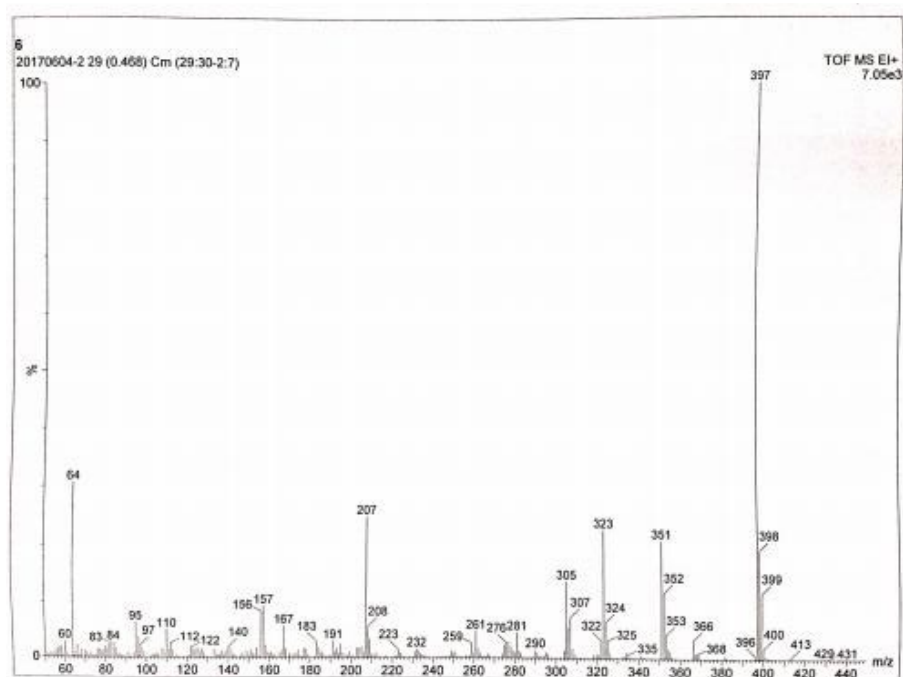

Figure S12. MS spectrum of compound 6

**Synthesis of 7:**  $^1\text{H}$  NMR(300MHz,  $\text{CDCl}_3$ ):  $\delta$  (ppm)=8.50(s,2H), 7.59-7.52(m, 4H), 7.14(s, 2H), 4.43-4.36(t, 4H), 1.47-1.33(t, 6H);  $^{13}\text{C}$  NMR(75MHz, $\text{CDCl}_3$ ):  $\delta$ (ppm)=163.2, 152.1, 148.9, 142.0, 133.4, 132.3, 128.1, 127.0, 61.3, 14.2. MS(EI-MS): calcd. for  $\text{C}_{20}\text{H}_{18}\text{N}_2\text{O}_4\text{S}_3$   $[\text{M}]^+$  446.5, found 446.

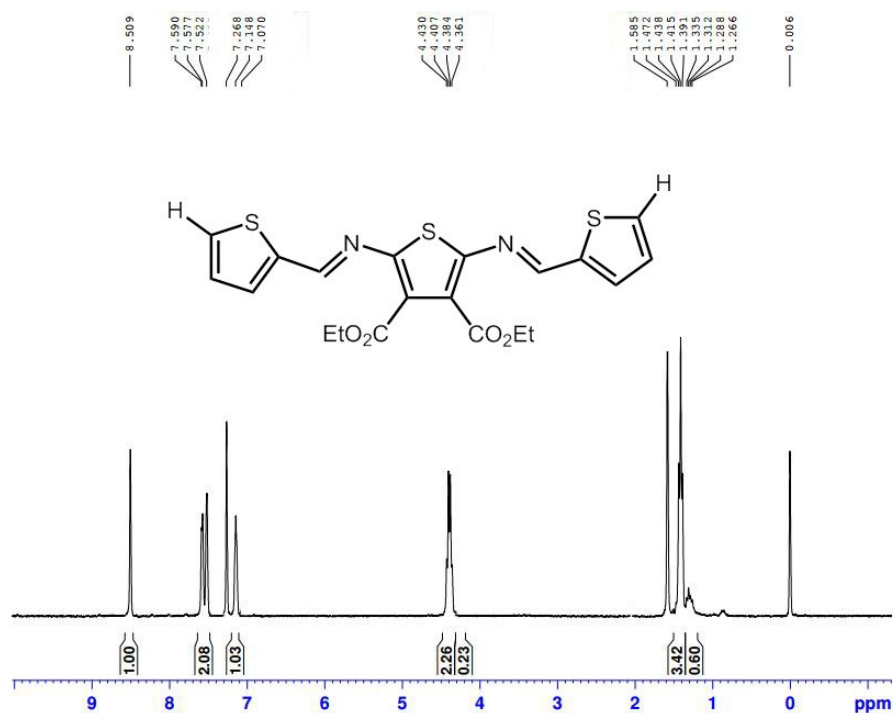

Figure S13. <sup>1</sup>H NMR spectrum of compound 7

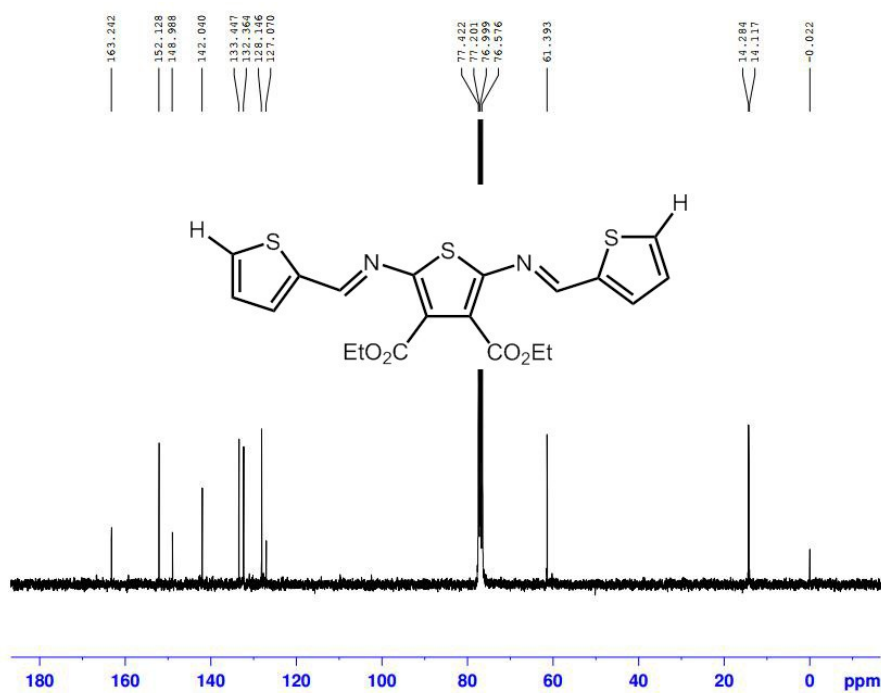

Figure S14. <sup>13</sup>C NMR spectrum of compound 7

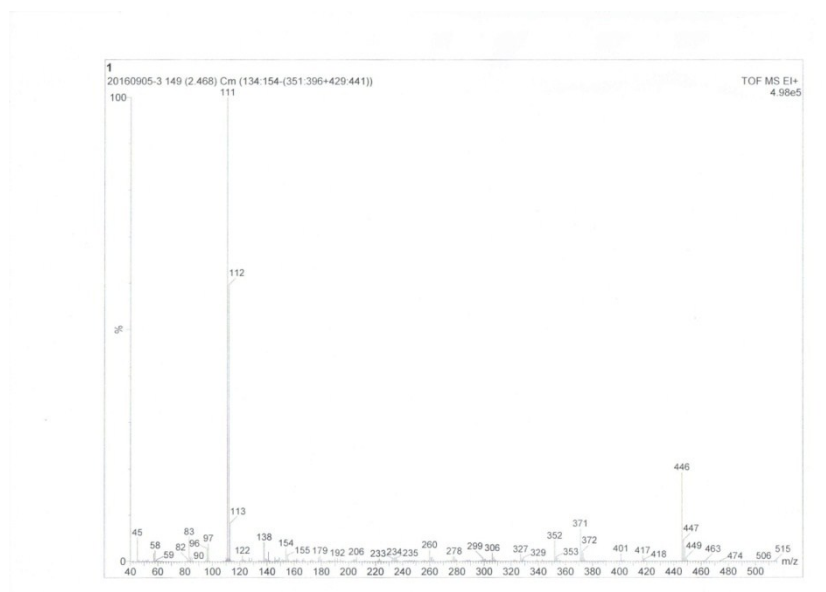

Figure S15. MS spectrum of compound 7

**Synthesis of 8:** 5-bromothiophene-2-carboxaldehyde(96mg, 0.5mmol) was dissolved in anhydrous toluene(30ml) at 0°C with DABCO (58 mg, 0.5 mmol) and the slow addition of  $\text{TiCl}_4$ (1.0 M solution in toluene) (510  $\mu\text{L}$ , 0.5 mmol).then 1(64.5 mg, 0.25 mmol) was added and the mixture was then refluxed overnight. The solvent was removed in vacuo, and the product was purified by chromatography on a silica gel column (dichloromethane), then recrystallized with ethanol to yield 8 (60mg, 40% yield) as a red solid.  $^1\text{H}$  NMR(300MHz,  $\text{CDCl}_3$ ):

$\delta$  (ppm)=8.31(s, 2H), 7.26-7.23(t, 2H), 7.10-7.08(d, 2H), 4.42-4.37(t, 4H), 1.43-1.38(t, 6H);  $^{13}\text{C}$  NMR(75MHz, $\text{CDCl}_3$ ):  $\delta$ (ppm)=163.0, 150.9, 148.6, 143.5, 133.5, 131.2, 127.6, 121.1, 61.4, 14.3. MS(MALDI-TOF): calcd. for  $\text{C}_{20}\text{H}_{16}\text{Br}_2\text{N}_2\text{O}_4\text{S}_3$  [M] $^+$ 604.3, found 604.

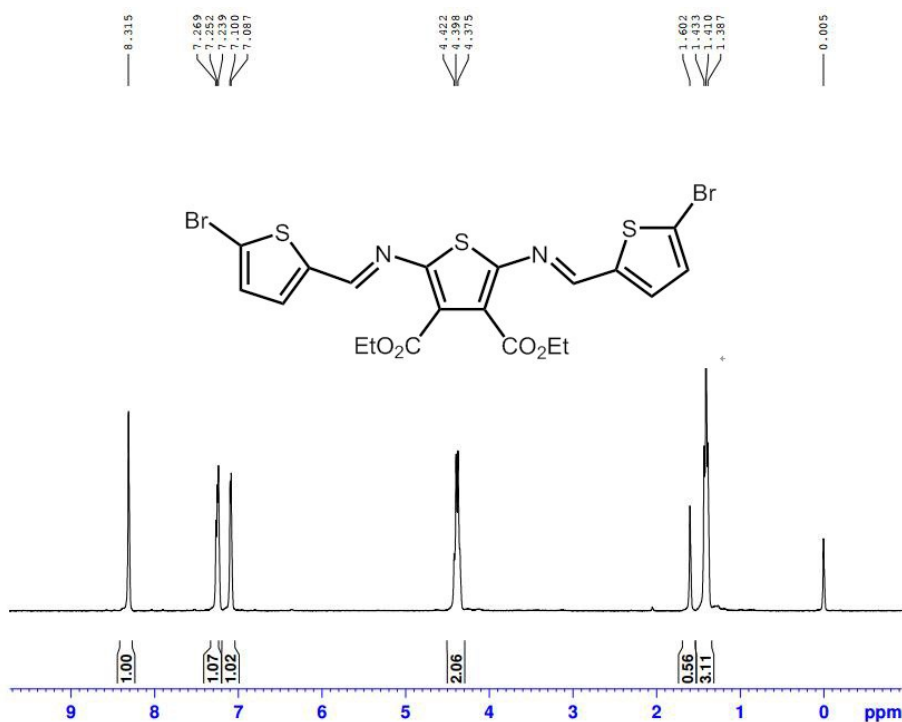

Figure S16.  $^1\text{H}$  NMR spectrum of compound 8

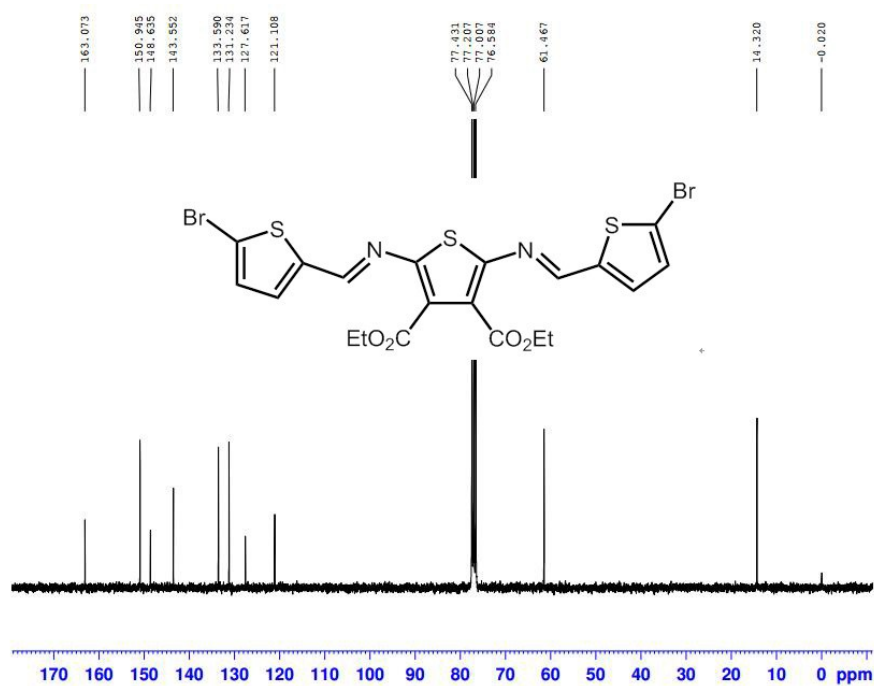

Figure S17.  $^{13}\text{C}$  NMR spectrum of compound 8

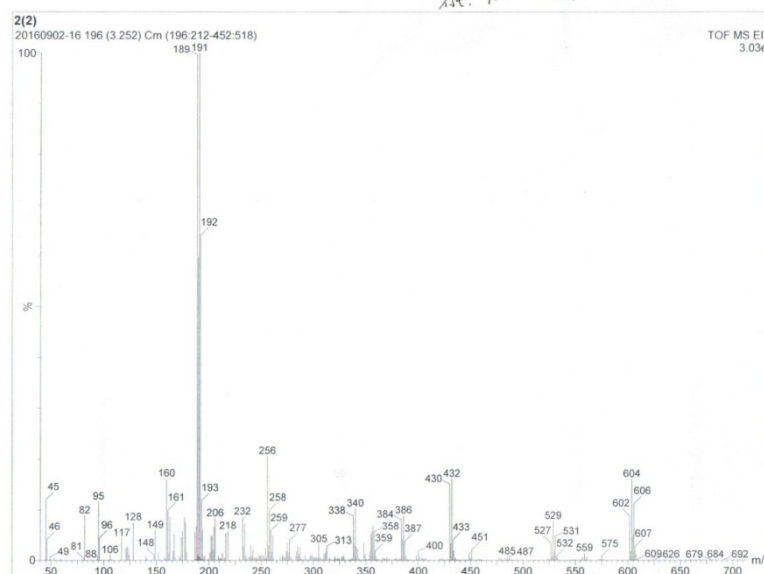

Figure S18. MS spectrum of compound 8

**Synthesis of 9:** The synthesis method was same as compound 8.  $^1\text{H}$  NMR(300MHz,  $\text{CDCl}_3$ ):  $\delta$  (ppm)=8.38(s, 2H), 7.31-7.26(d, 2H), 6.80(s, 2H), 4.41-4.34(t, 4H), 2.58-2.50(t, 6H), 1.43-1.38(t, 6H);  $^{13}\text{C}$  NMR(75MHz, $\text{CDCl}_3$ ):  $\delta$ (ppm)=163.3, 151.9, 149.0, 148.4, 139.9, 134.1, 126.8, 126.1, 61.2, 16.1, 14.3. MS(EI-MS): calcd. for  $\text{C}_{22}\text{H}_{22}\text{N}_2\text{O}_4\text{S}_3$  [ $\text{M}+\text{H}^+$ ] $^+$ 474, found 474.

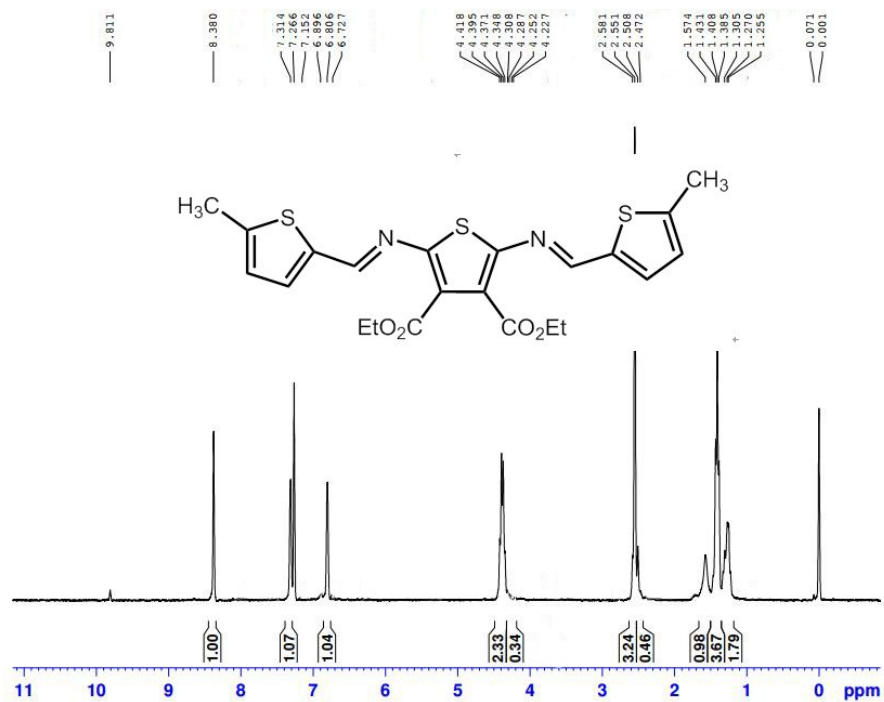

Figure S19. <sup>1</sup>H NMR spectrum of compound 9

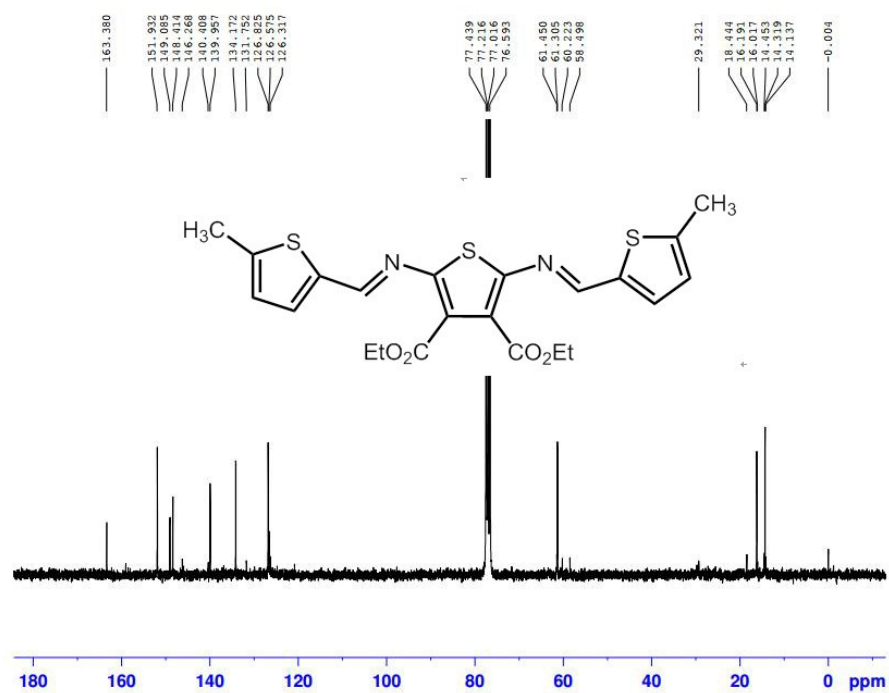

Figure S20. <sup>13</sup>C NMR spectrum of compound 9

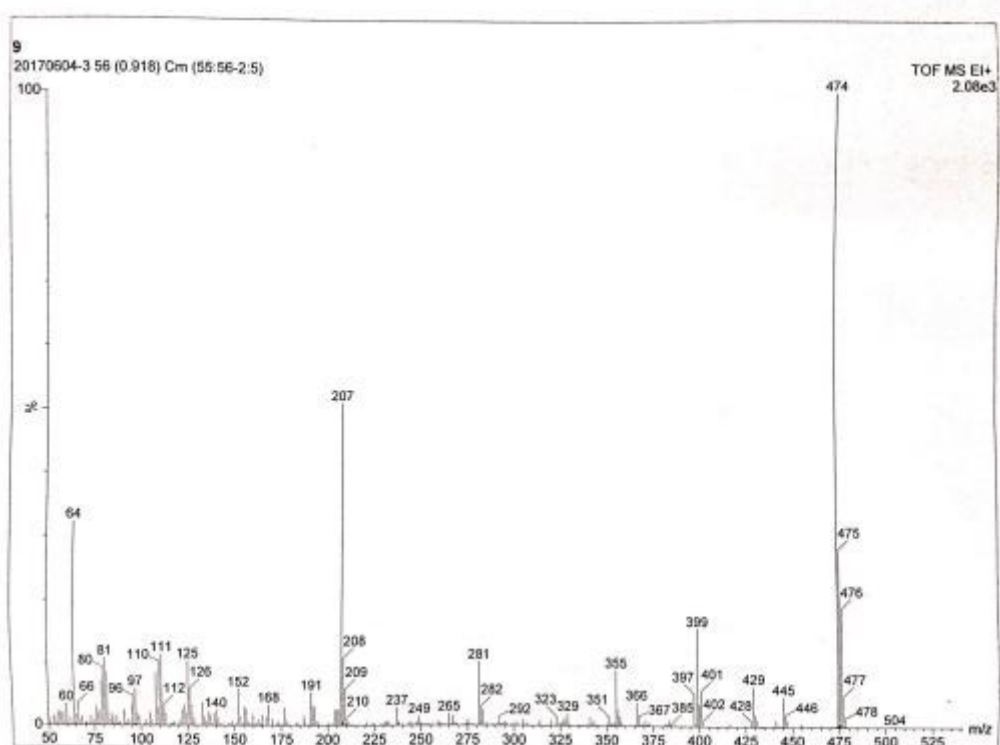

Figure S21. MS spectrum of compound 9

**Synthesis of 10:** The synthesis method was same as compound 8.  $^1\text{H}$  NMR(300MHz,  $\text{CDCl}_3$ ):  $\delta$  (ppm)=8.45(s, 2H), 8.10-7.91(d, 2H), 7.43(s, 2H), 4.44-4.41(t, 4H), 1.30-1.23(t, 6H);  $^{13}\text{C}$  NMR(75MHz,  $\text{CDCl}_3$ ):  $\delta$ (ppm)=155.1, 150.9, 148.3, 146.9, 131.0, 128.5, 61.9, 14.3. MS(EI-MS): calcd. for  $\text{C}_{20}\text{H}_{16}\text{N}_4\text{O}_8\text{S}_3$   $[\text{M}]^+$  536, found 536.

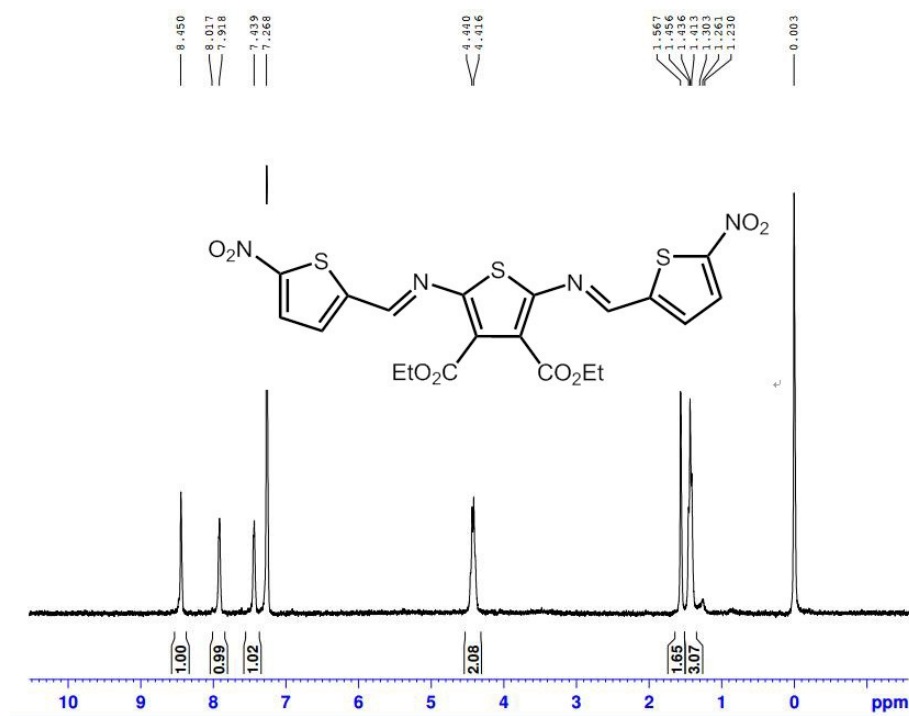

Figure S22. <sup>1</sup>H NMR spectrum of compound 10

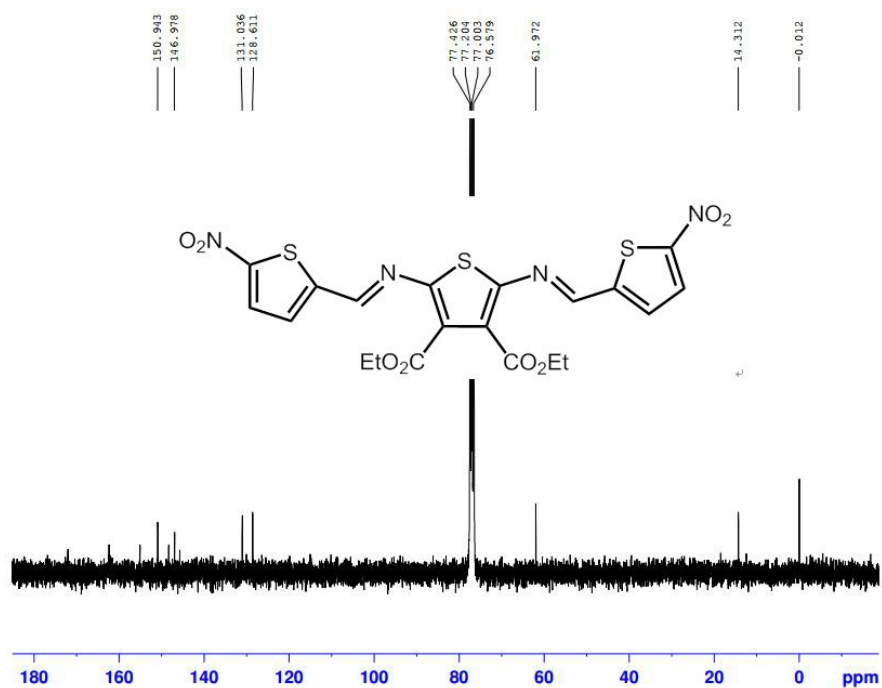

Figure S23. <sup>13</sup>C NMR spectrum of compound 10

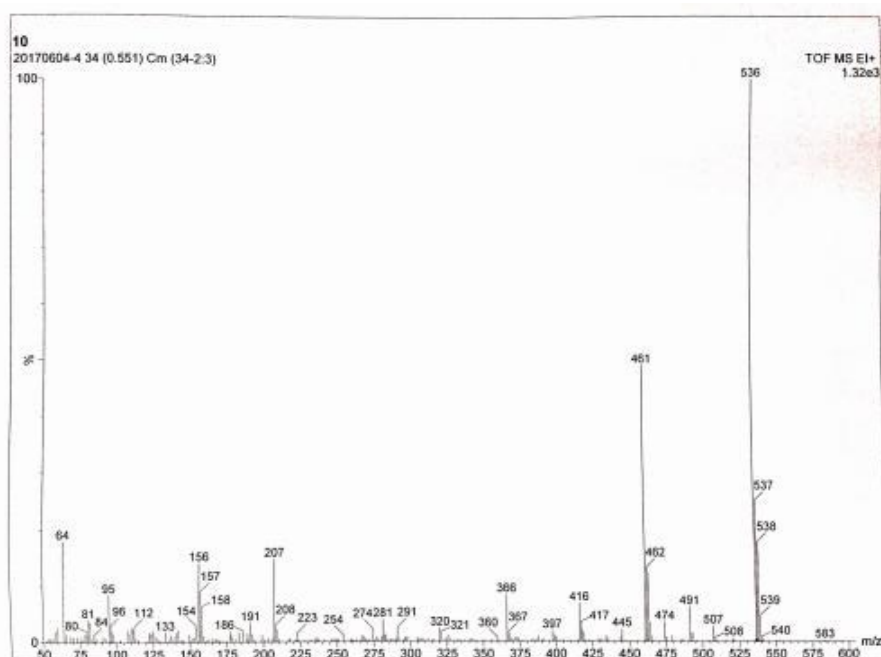

Figure S24. MS spectrum of compound 10

**Synthesis of 3,4-dihexylthiophene:** 3,4-dibromothiophene(4.89g, 20mmol) was dissolved in anhydrous tetrahydrofuran(150ml) under nitrogen, 1,3-Bis(diphenylphosphino)propane nickel(II) chloride(0.2g, 0.4mmol) was added and the slow addition of hexylmagnesium bromide (1.0 M solution in tetrahydrofuran) (67mL, 67 mmol), the mixture was then refluxed for 18 hours. Cooling to room temperature, then filtrate, the solution was washed with aqueous HCl (10% w/w). The organic phase was washed with water, dried with MgSO<sub>4</sub>, filtered and the solvent was evaporated. The product was purified by chromatography on a silica gel column (Petroleum ether) to yield 3,4-dihexylthiophene(2.95g, 58% yield) as colorless oil. <sup>1</sup>H NMR(300MHz, CDCl<sub>3</sub>): δ (ppm)= 6.98(s,2H), 2.72-2.55(m, 4H), 1.69(s, 4H), 1.39(s, 12H), 0.98(s, 6H); <sup>13</sup>C NMR(75MHz, CDCl<sub>3</sub>): δ(ppm)=143.2, 125.0, 31.7, 31.4, 31.0, 30.3, 29.9, 29.8, 29.7, 29.3, 22.5, 22.3, 14.1, 14.0. MS(EI-MS): calcd. for C<sub>16</sub>H<sub>28</sub>S [M]<sup>+</sup> 252.4, found 252.

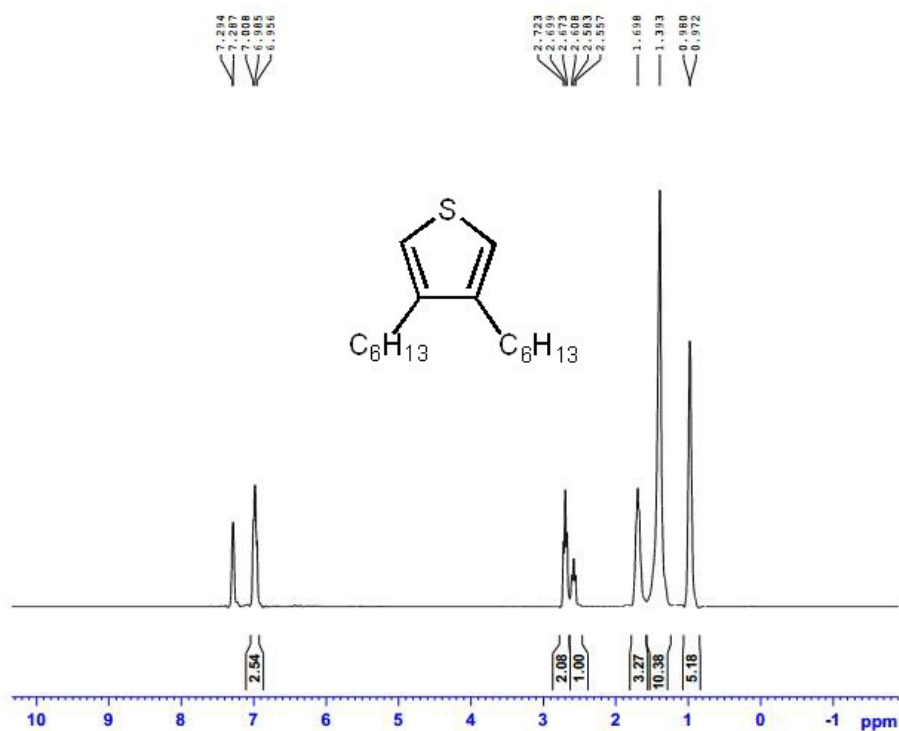

Figure S25. <sup>1</sup>H NMR spectrum of compound 3,4-dihexylthiophene

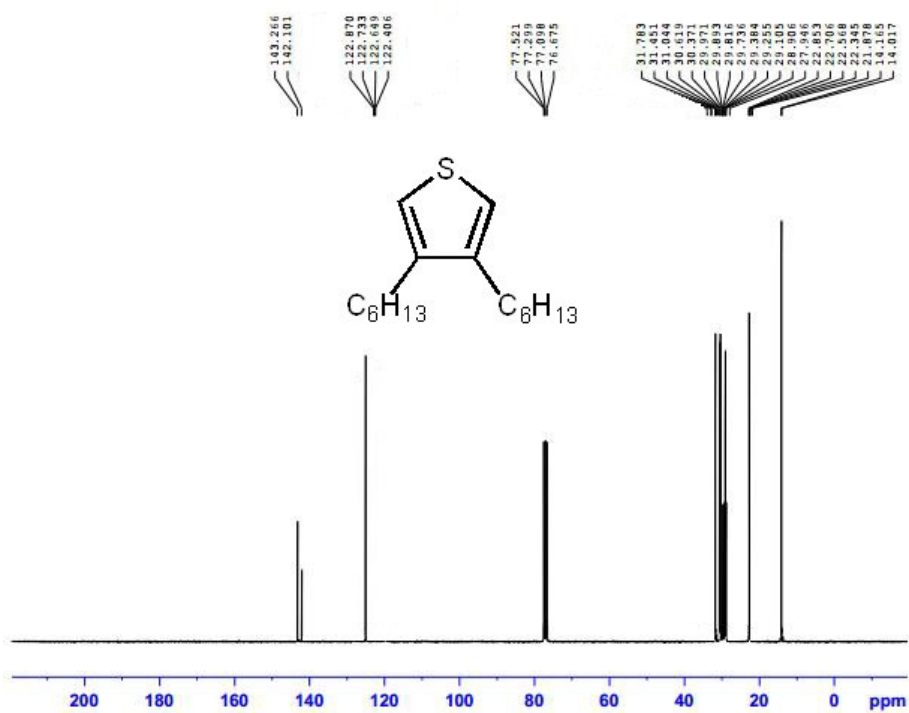

Figure S26. <sup>13</sup>C NMR spectrum of compound 3,4-dihexylthiophene

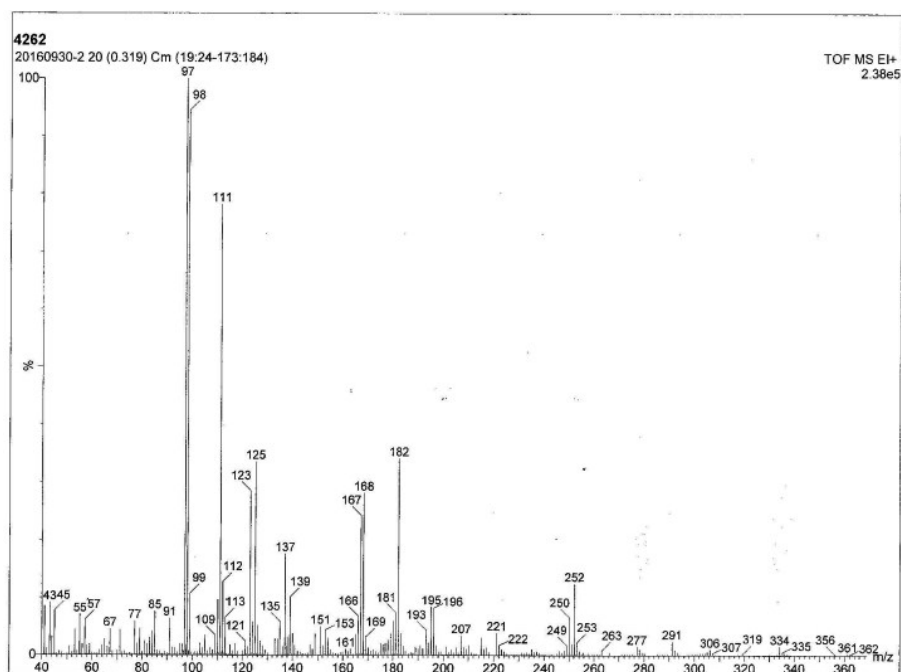

Figure S27. MS spectrum of compound 3,4-dihexylthiophene

**Synthesis of 3,4-dihexylthiophene-2,5-dicarbaldehyde:** 3,4-dihexylthiophene (2.32g, 9.24mmol) and freshly distilled TMEDA(4ml, 24mmol) dissolved in anhydrous hexanes(80ml) under nitrogen. n-BuLi(1.6 M in hexane, 15mL, 24mmol) was added drop-wise, reflux for 1.5 h, THF (40 mL) was added and the solution was cooled to -50 °C. Absolute anhydrous DMF (4mL, 54 mmol) was added drop-wise. Heating to room temperature and stirred for 2.5h, the reaction mixture was hydrolyzed with water (100 mL) and extracted with ether. dried with MgSO<sub>4</sub>, filtered and the solvent was evaporated. The product was purified by chromatography on a silica gel column (Petroleum ether/dichloromethane,1:1) to yield 3,4-dihexylthiophene -2,5-dicarbaldehyde (1.12g, 40% yield) as colorless oil. <sup>1</sup>H NMR(300MHz, CDCl<sub>3</sub>): δ(ppm)=10.11(s, 2H), 2.92-2.87(t, 4H), 1.63-1.53(m, 4H), 1.43-1.32(m, 12H), 0.91-0.87(t, 6H); <sup>13</sup>C NMR(75MHz, CDCl<sub>3</sub>): δ(ppm)=183.3, 152.4, 151.7, 143.2, 32.1, 31.4, 29.5, 29.2, 27.4, 26.9, 26.6, 22.5, 14.0. MS(EI-MS): calcd. for C<sub>18</sub>H<sub>28</sub>O<sub>2</sub>S [M]<sup>+</sup> 308.4, found 308.

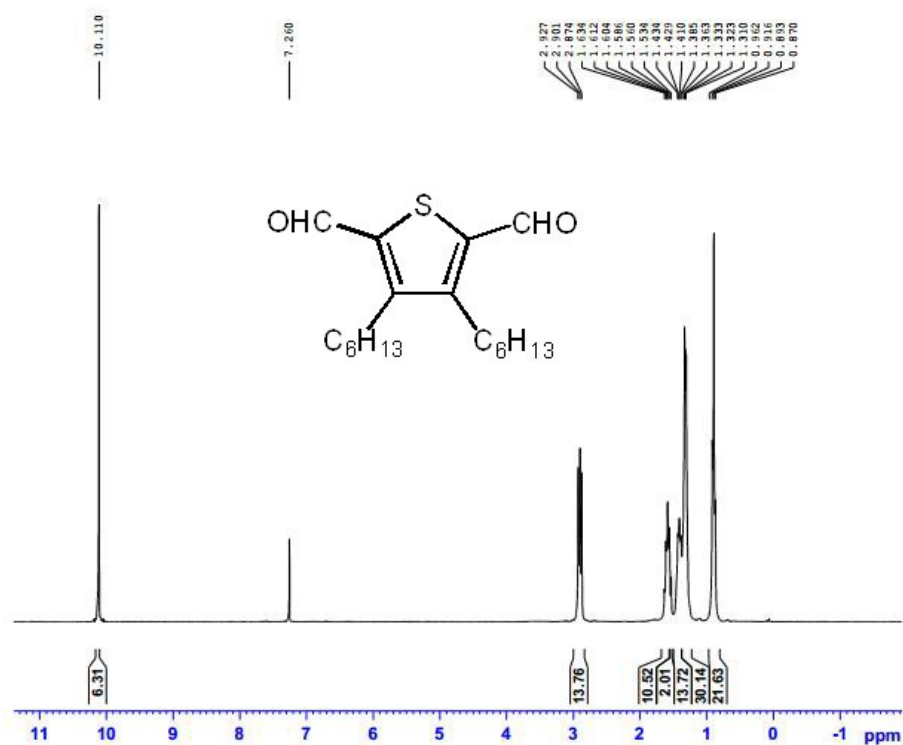

Figure S28. <sup>1</sup>H NMR spectrum of compound 3,4-dihexylthiophene -2,5-dicarbaldehyde

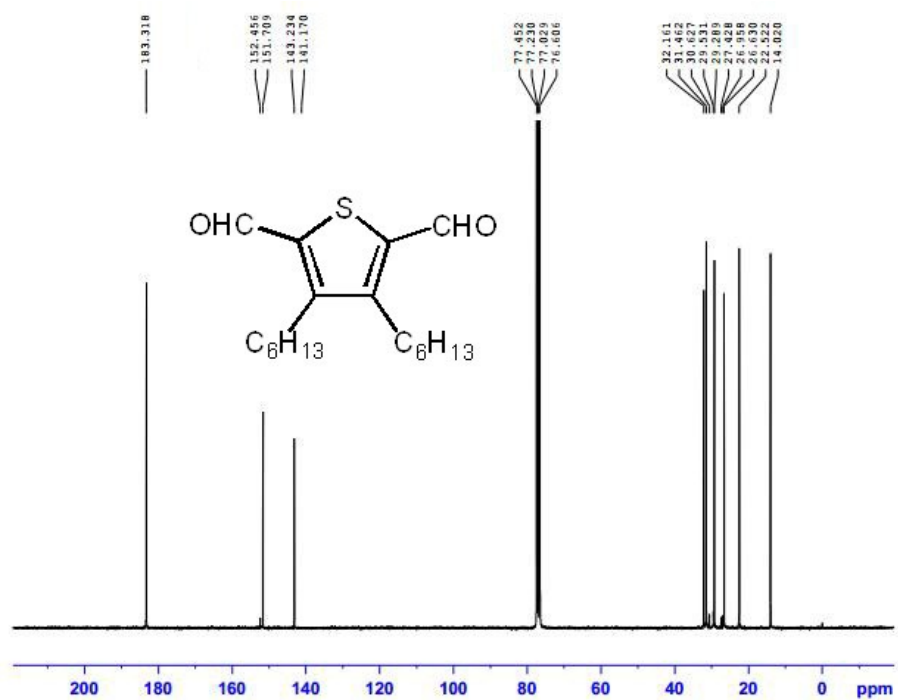

Figure S29. <sup>13</sup>C NMR spectrum of compound 3,4-dihexylthiophene -2,5-dicarbaldehyde

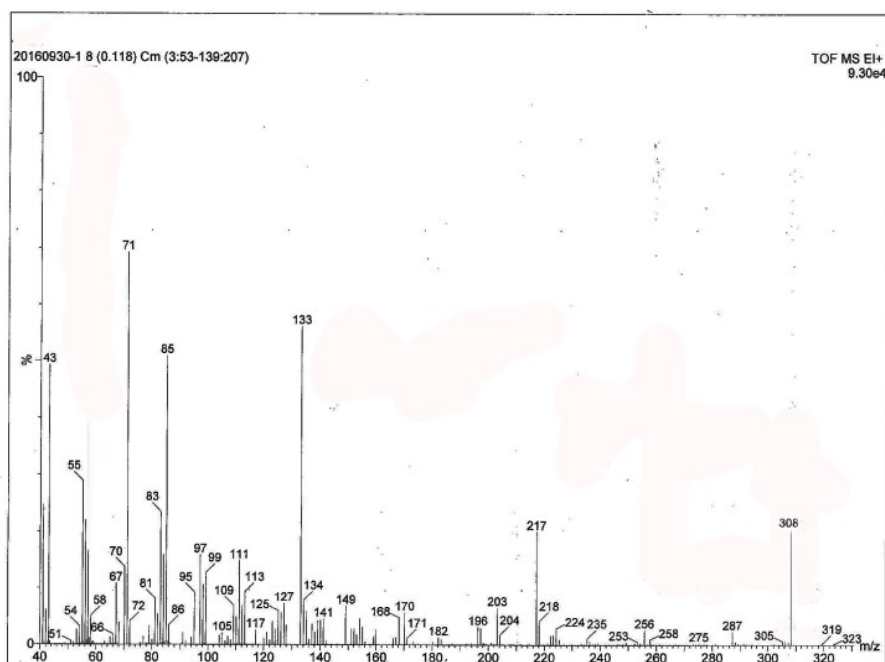

Figure S30. MS spectrum of compound 3,4-dihexylthiophene-2,5-dicarbaldehyde

**Synthesis of 11:** In a 100 mL round bottom flask were dissolved 2 (132.68mg, 1.07 mmol) in butyl alcohol (20 mL), 3,4-dihexylthiophene-2,5-dicarbaldehyde (64.7mg, 0.21mmol) was added. The mixture was refluxed for 48 hours. The solvent was removed in vacuo, and the product was purified by chromatography on a silica gel column (dichloromethane), then recrystallized with ethanol to yield 11 (84mg, 77 % yield) as a red solid.  $^1\text{H}$  NMR(300MHz,  $\text{CDCl}_3$ ):  $\delta$ (ppm)=8.69(s, 2H), 7.15-7.10(m, 4H), 2.87-2.84(d, 4H), 1.57(s, 4H), 1.43-1.26(m, 12H), 0.89(s, 6H);  $^{13}\text{C}$  NMR(75MHz,  $\text{CDCl}_3$ ):  $\delta$ (ppm)=162.9, 152.3, 150.1, 140.8, 128.2, 121.9, 114.5, 104.7, 31.7, 31.5, 29.3, 27.2, 22.5, 14.0. MS(MALDI-TOF) calcd. for  $\text{C}_{18}\text{H}_{32}\text{N}_4\text{S}_3$   $[\text{M}]^+$  520.7, found 521.1

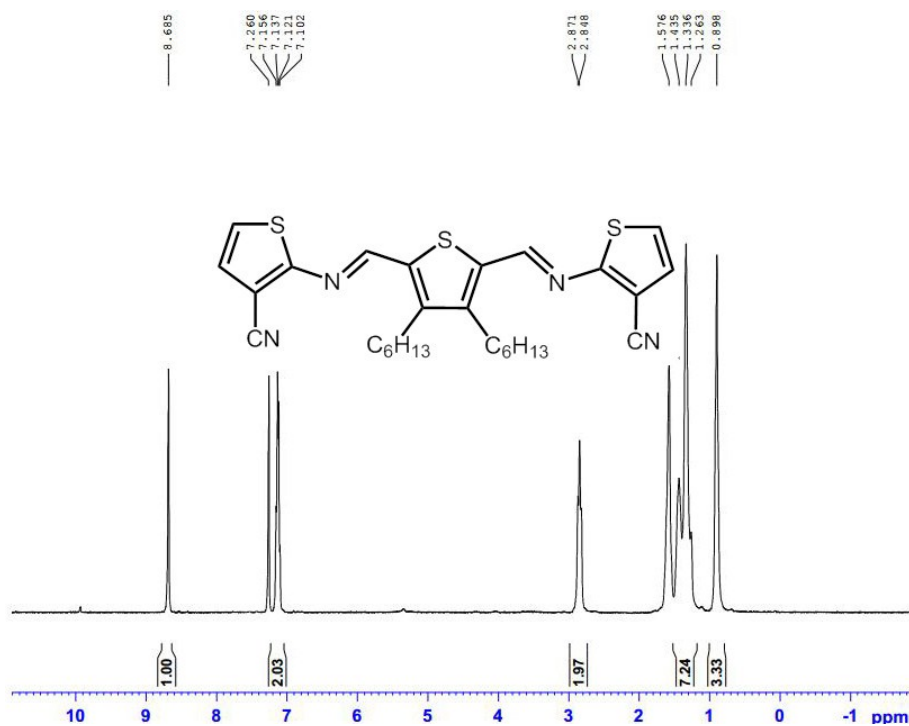

Figure S31.  $^1\text{H}$  NMR spectrum of compound 11

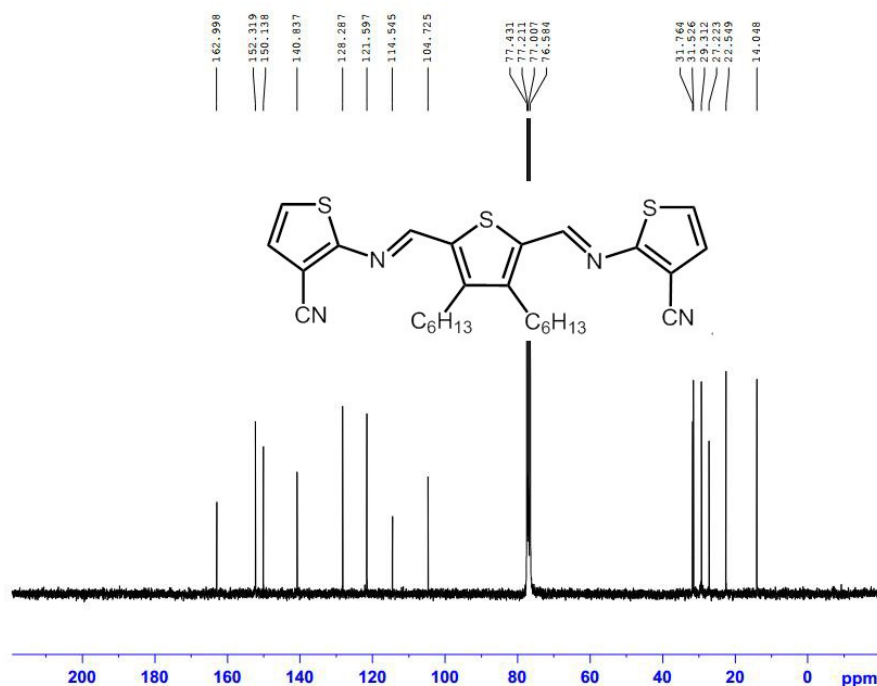

Figure S32.  $^{13}\text{C}$  NMR spectrum of compound 11

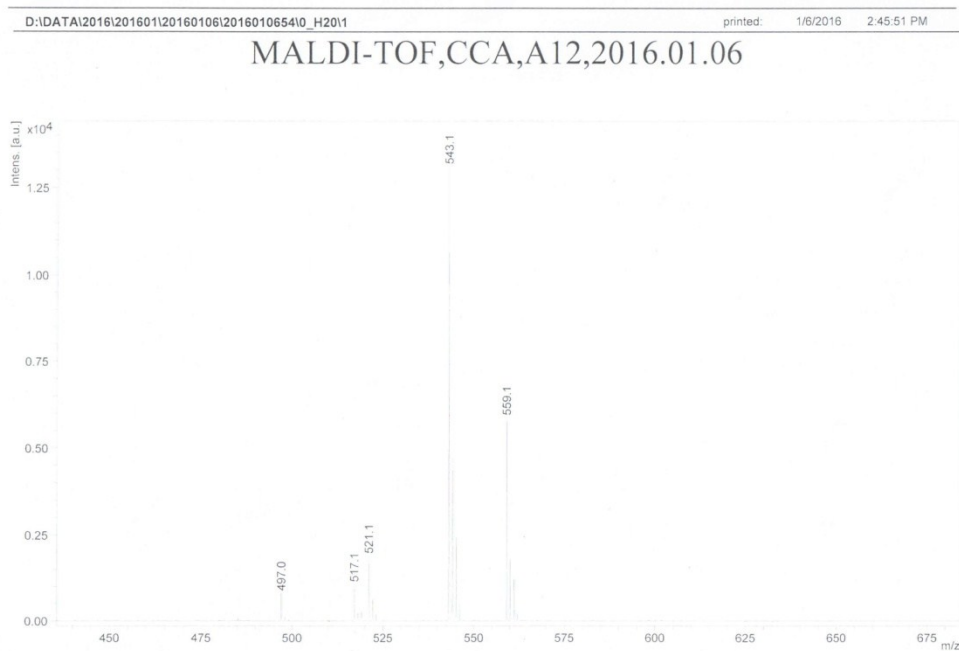

Figure S33. MS spectrum of compound 11

**Synthesis of 3,4-didecylthiophene:** The synthesis method was same as 3,4-dihexylthiophene.  $^1\text{H}$  NMR(300MHz,  $\text{CDCl}_3$ ):  $\delta$  (ppm)=6.89(s,2H), 2.53-2.48(t, 4H), 1.62(s, 4H), 1.28(s, 28H), 0.89(s, 6H);  $^{13}\text{C}$  NMR(75MHz,  $\text{CDCl}_3$ ):  $\delta$ (ppm)=143.2, 142.1, 119.8, 119.7, 31.9, 30.5, 30.2, 29.7, 29.6, 29.5, 29.3, 28.8, 22.6, 14.0. MS(EI-MS) calcd. for  $\text{C}_{24}\text{H}_{44}\text{S}$   $[\text{M}]^+$  364.6, found 364.

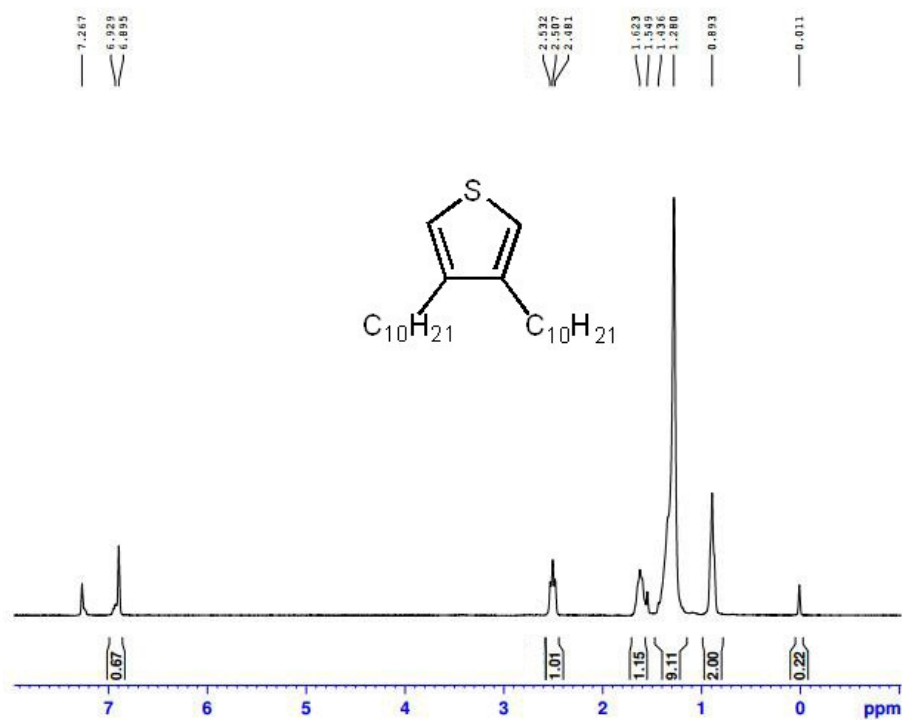

Figure S34. <sup>1</sup>H NMR spectrum of compound 3,4-didecylthiophene

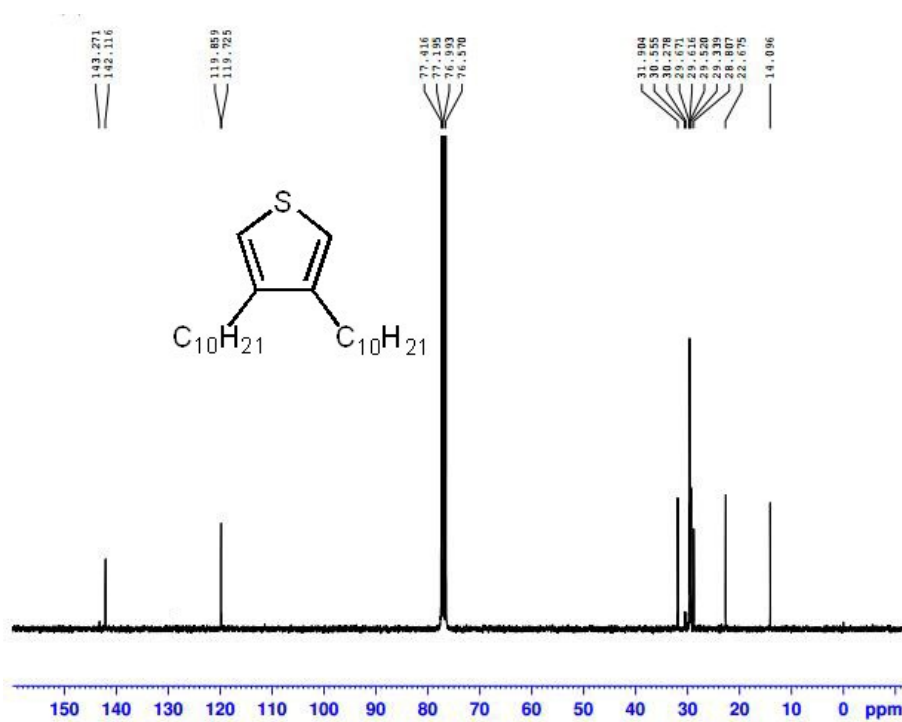

Figure S35. <sup>13</sup>C NMR spectrum of compound 3,4-didecylthiophene

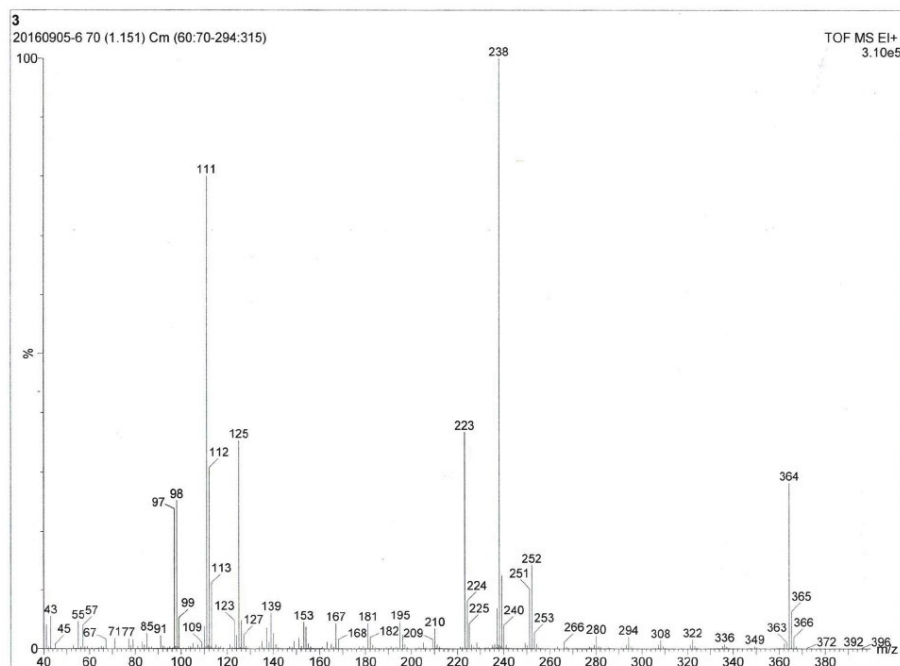

Figure S36. MS spectrum of compound 3,4-didecylthiophene

**Synthesis of 3,4-didecylthiophene-2,5-dicarbaldehyde:** The synthesis method was same as 3,4-dihexylthiophene-2,5-dicarbaldehyde.  $^1\text{H}$  NMR(300MHz,  $\text{CDCl}_3$ ):  $\delta(\text{ppm})=10.12$  (s, 2H), 2.93-2.88(t, 4H), 1.64-1.56(m, 4H), 1.45-1.27(m, 28H), 0.90-0.86 (t, 6H);  $^{13}\text{C}$  NMR(75MHz,  $\text{CDCl}_3$ ):  $\delta(\text{ppm})=183.2, 151.6, 143.2, 32.1, 31.8, 29.6, 29.5, 29.4, 29.2, 26.6, 22.6, 14.0$ . MS(EI-MS) calcd. for  $\text{C}_{26}\text{H}_{44}\text{O}_2\text{S}$  [M] + 420.7, found 420.

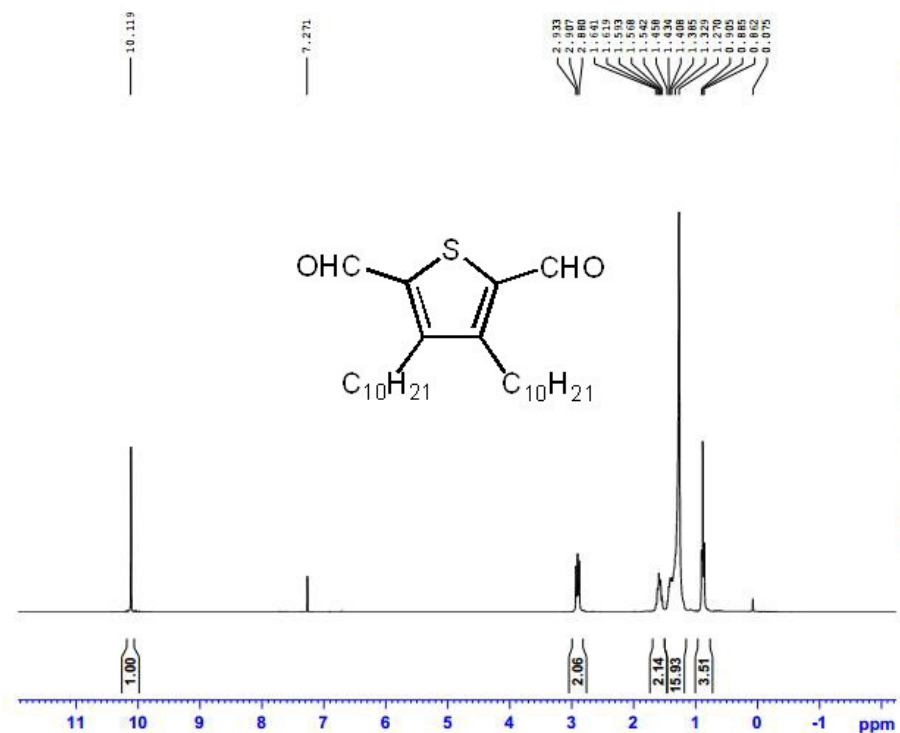

Figure S37.  $^1\text{H}$  NMR spectrum of compound 3,4-didecylthiophene-2,5-dicarbaldehyde

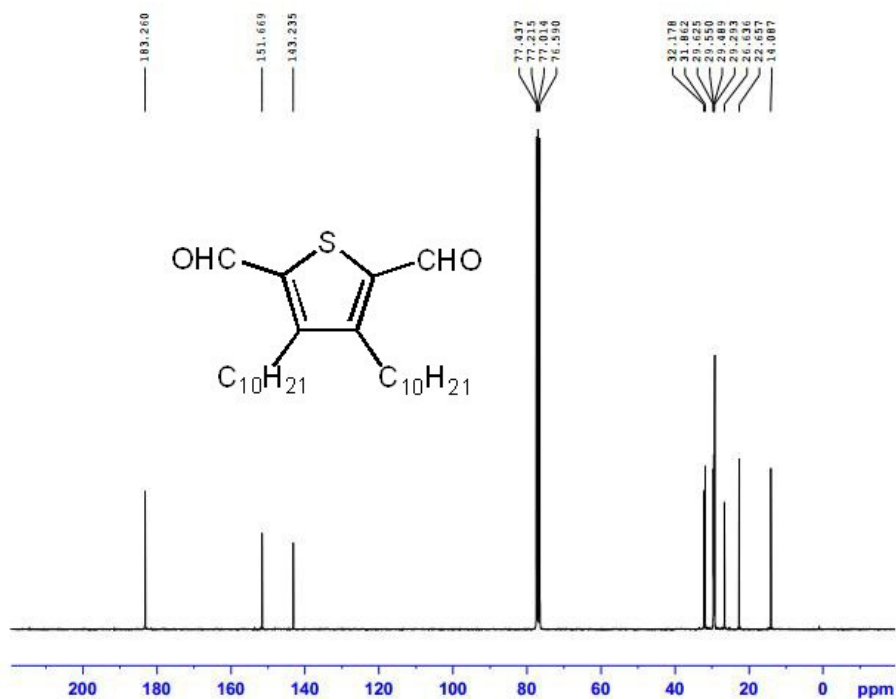

Figure S38.  $^{13}\text{C}$  NMR spectrum of compound 3,4-didecylthiophene-2,5-dicarbaldehyde

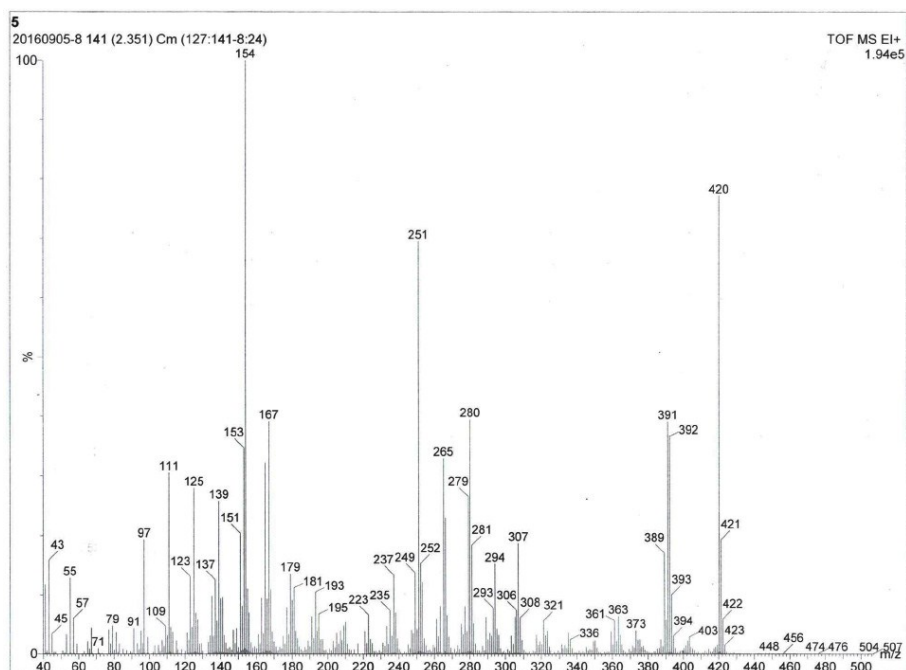

Figure S39. MS spectrum of compound 3,4-didecylthiophene-2,5-dicarbaldehyde

**Synthesis of 12:** The synthesis method was same as compound 11.  $^1\text{H}$  NMR(300MHz,  $\text{CDCl}_3$ ):

$\delta(\text{ppm})=8.69$  (s, 2H), 7.14-7.11 (m, 4H), 2.85(t, 4H), 1.60(s, 4H), 1.43-1.27(m, 28H), 0.88(s, 6H);

$^{13}\text{C}$  NMR(75MHz,  $\text{CDCl}_3$ ):  $\delta(\text{ppm})=162.9$ , 152.6, 152.3, 151.7, 150.1, 140.9, 140.8, 128.2, 122.0, 121.9, 121.5, 114.5, 104.7, 31.8, 31.7, 29.6, 29.5, 29.3, 28.9, 27.2, 26.9, 25.2, 22.6, 14.1.

MS(MALDI-TOF): calcd. for  $\text{C}_{26}\text{H}_{48}\text{N}_4\text{S}_3$   $[\text{M}]^+ 632.3$ , found 633.

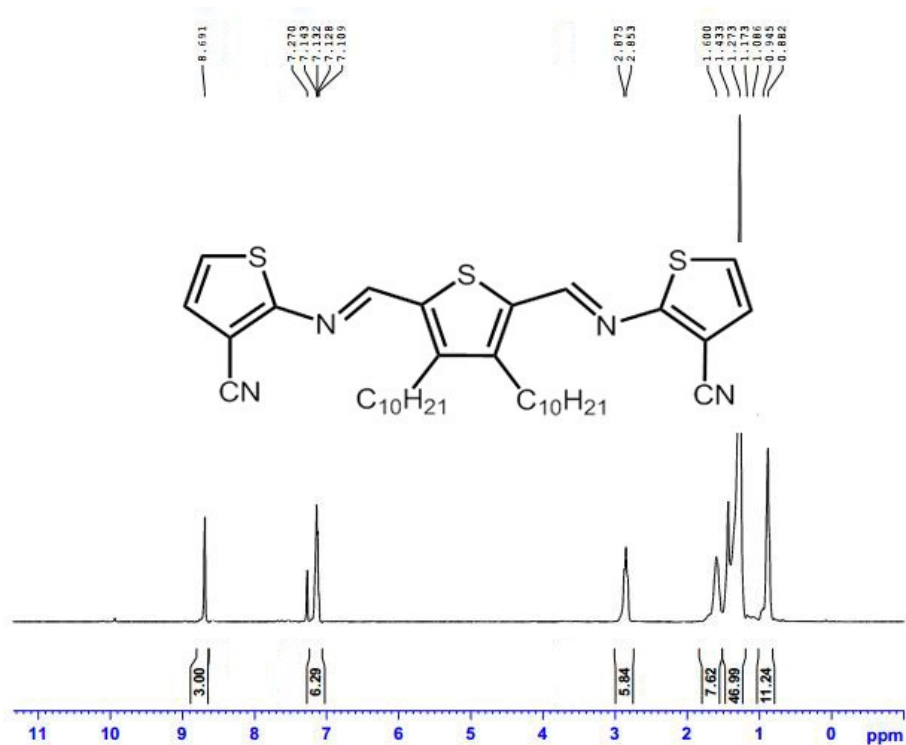

Figure S40. <sup>1</sup>H NMR spectrum of compound 12

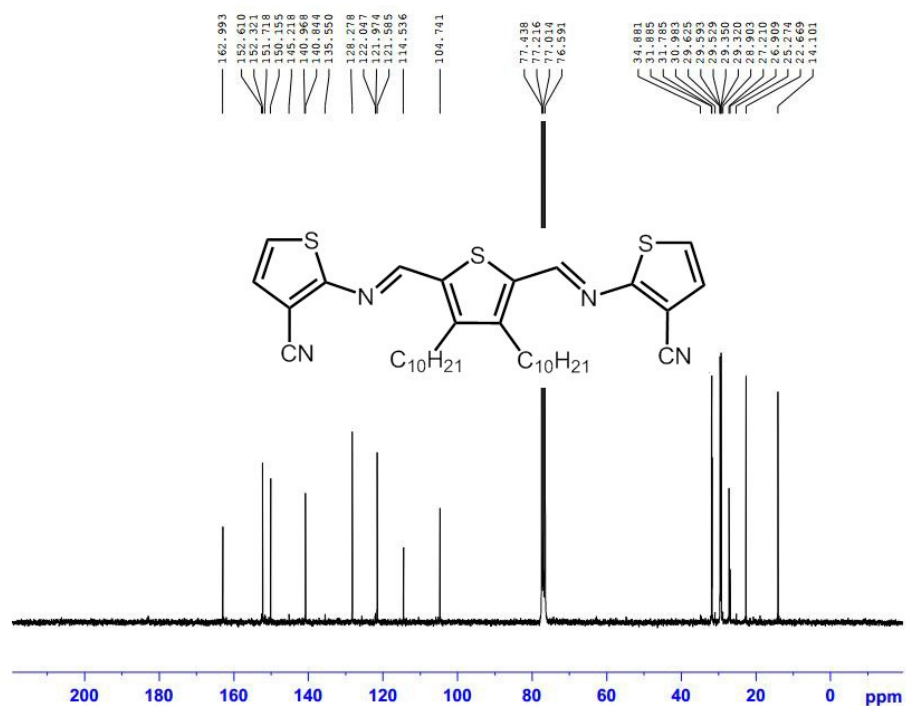

Figure S41. <sup>13</sup>C NMR spectrum of compound 12

## MALDI-TOF,CCA,A8,2016.01.05

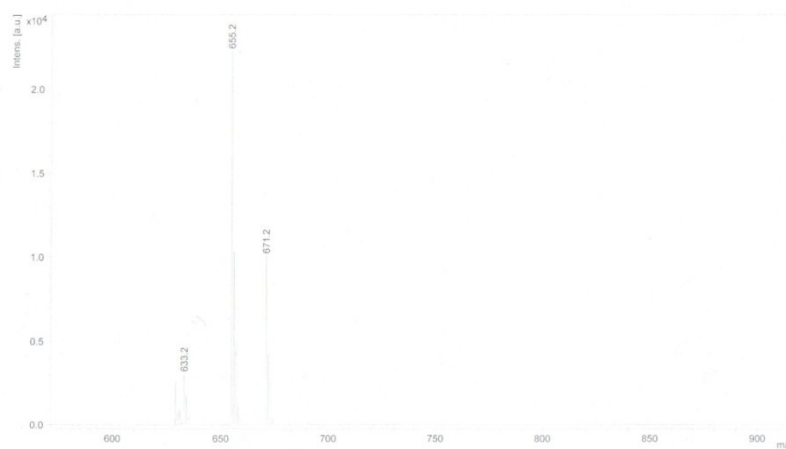

Figure S42. MS spectrum of compound 12

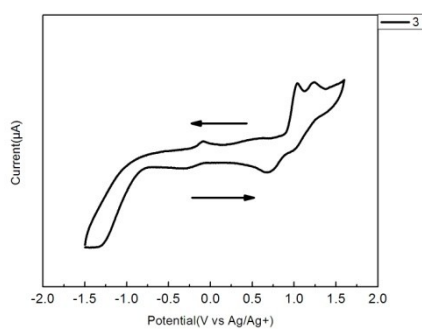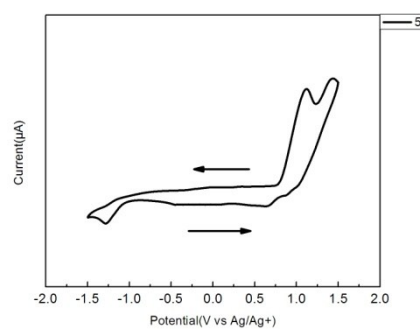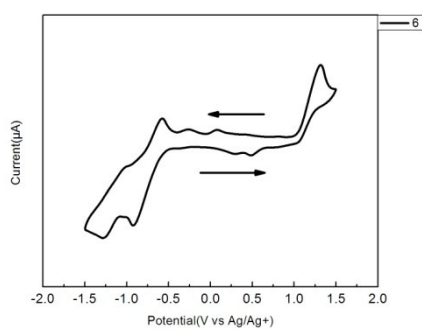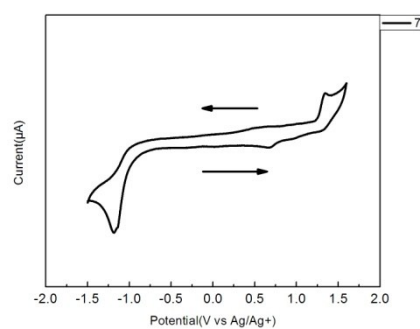

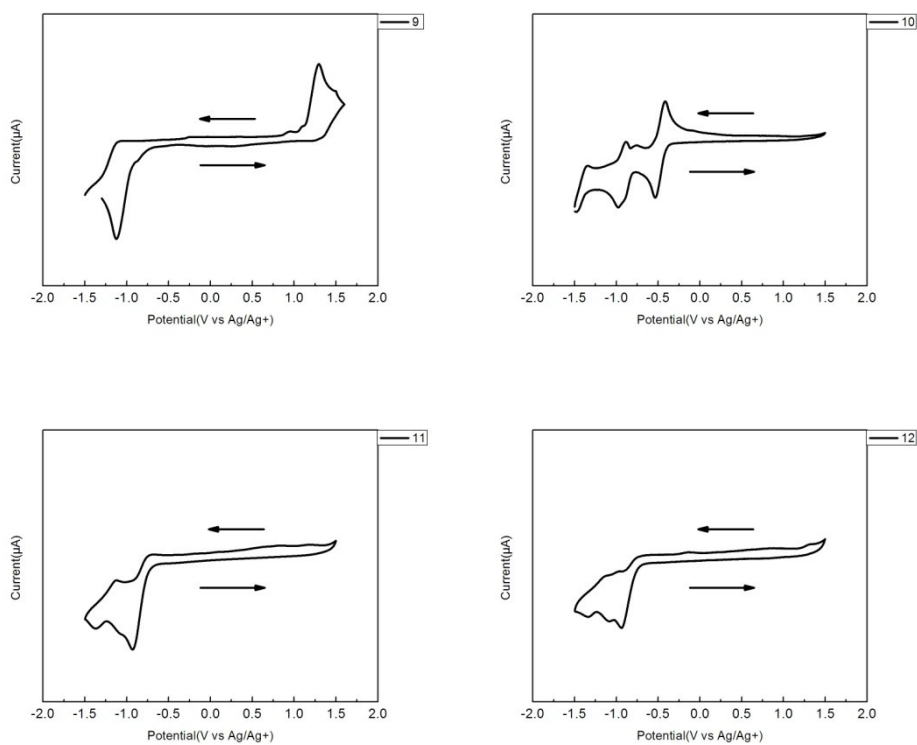

Figure S43. Cyclic voltammograms of thiopheno azomethines(3,5,6,7,9,10,11,12) at  $(1.0 \times 10^{-4} \text{ M})$  concentration in dry dichloromethane.
